## Correction

# Correction: Inferring on the Intentions of Others by Hierarchical Bayesian Learning

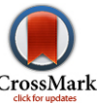**The PLOS Computational Biology Staff**

There is an affiliation missing for the second author Christoph Mathys. The full list of affiliations for this author should read:

Translational Neuromodeling Unit (TNU), Institute for Biomedical Engineering, University of Zurich and ETH Zurich, Zurich, Switzerland,

Laboratory for Social and Neural Systems Research, Department of Economics, University of Zurich, Zurich, Switzerland,

Wellcome Trust Centre for Neuroimaging, University College London, London, United Kingdom

Max Planck UCL Centre for Computational Psychiatry and Ageing Research, London, United Kingdom

**Reference**

1. Diaconescu AO, Mathys C, Weber LAE, Daunizeau J, Kasper L, et al. (2014) Inferring on the Intentions of Others by Hierarchical Bayesian Learning. *PLoS Comput Biol* 10(9): e1003810. doi:10.1371/journal.pcbi.1003810

---

**Citation:** The PLOS Computational Biology Staff (2014) Correction: Inferring on the Intentions of Others by Hierarchical Bayesian Learning. *PLoS Comput Biol* 10(10): e1003952. doi:10.1371/journal.pcbi.1003952

**Published:** October 16, 2014

**Copyright:** © 2014 The PLOS Computational Biology Staff. This is an open-access article distributed under the terms of the Creative Commons Attribution License, which permits unrestricted use, distribution, and reproduction in any medium, provided the original author and source are credited.
